# Supplementary material for: Blue micro-/nanoplastics abundance in the environment: a double threat as a Trojan horse for a plastic-Cu-phthalocyanine pigment and an opportunity for nanoplastic detection via micro-Raman spectroscopy
Source: Royal Society of Chemistry journal article supplement (doi:10.1039/d4en00820k), 2025-01-01
Supplement: d4en00820k1.pdf [file d4en00820k1.pdf]

## Supplementary Material

### Blue micro-nanoplastics abundance in the environment: a double threat as Trojan Horse of plastic-Cu-phthalocyanine pigment and an opportunity for nanoplastic detection via micro-Raman spectroscopy

Ioana Marica<sup>abc</sup>, Ion Nesterovschi<sup>ab</sup>, Lucian Barbu-Tudoran<sup>c</sup> and Simona Cîntă Pînzaru<sup>ab\*</sup>

<sup>a</sup>*Faculty of Physics, Babeş-Bolyai University, Kogălniceanu 1, 400084 Cluj-Napoca, Romania*

<sup>b</sup>*RDI Laboratory of Applied Raman Spectroscopy, RDI Institute of Applied Natural Sciences (IRD-ANS), Babeş-Bolyai University, Fântânele 42, Cluj-Napoca 400293, Romania*

<sup>c</sup>*National Institute for Research and Development of Isotopic and Molecular Technologies, Donath 67-103, 400293 Cluj-Napoca, Romania*

e-mail: [simona.pinzaru@ubbcluj.ro](mailto:simona.pinzaru@ubbcluj.ro), [ioana.marica@ubbcluj.ro](mailto:ioana.marica@ubbcluj.ro)

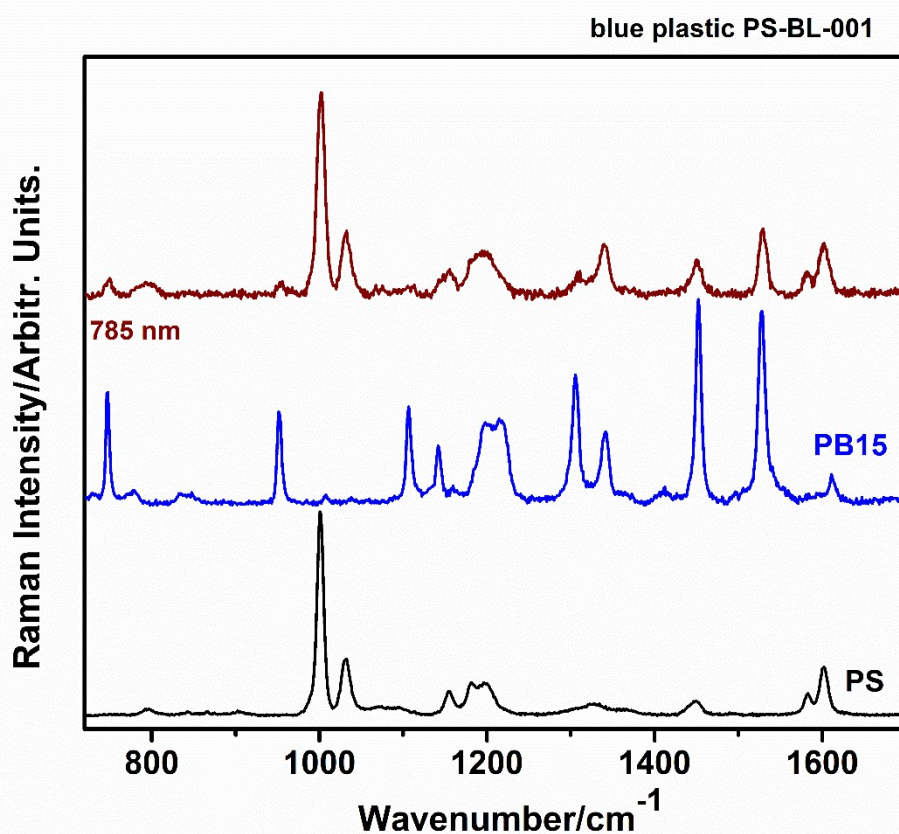

**Figure S1.** Normalized Raman spectra of a blue polystyrene macroplastic (PS-BL-001) at 785 nm excitation (dark red line); with blue line is the specific Raman spectrum of PB15 pigment (excitation: 632.8 nm) and with black line is the reference spectra of polystyrene (excitation: 785 nm).

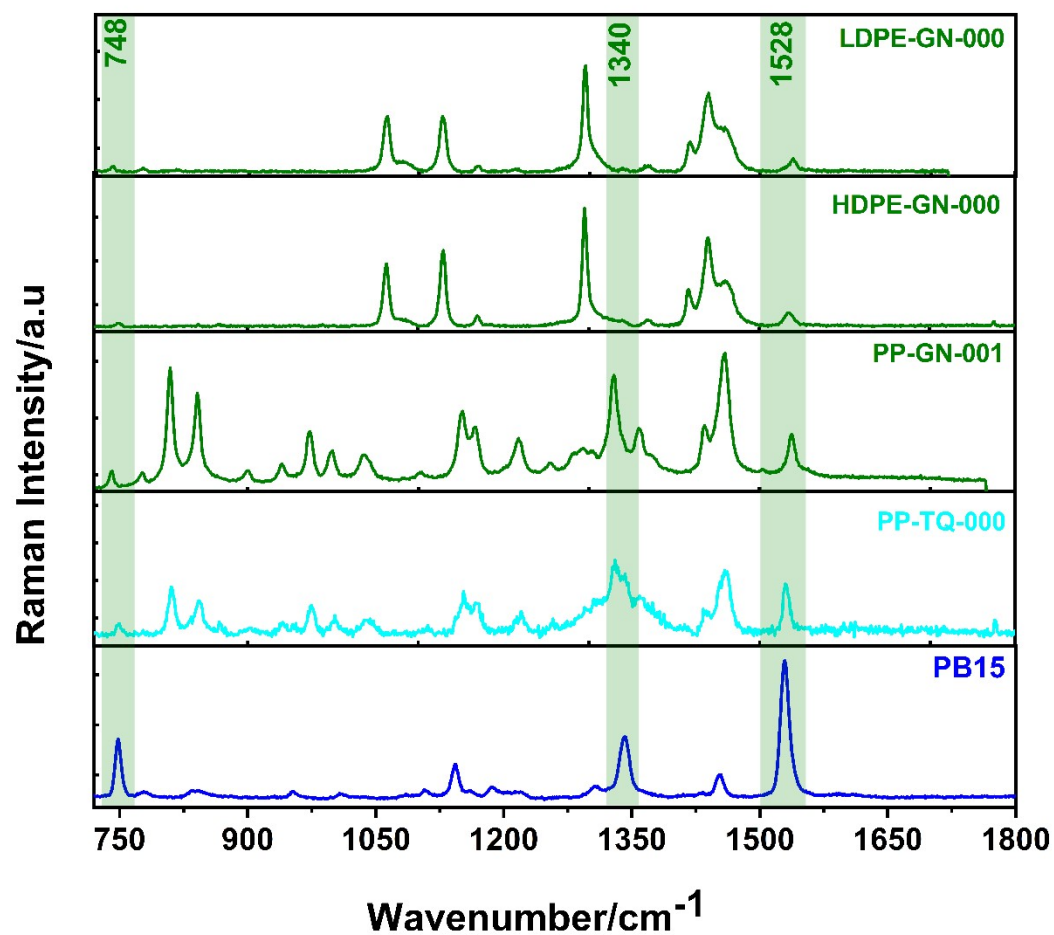

**Figure S2.** The Raman spectra of the green and one cyan macroplastics, encompassing three types of plastics: LDPE, HDPE, and PP; the bottom spectrum in blue is corresponding to PB15 pigment. Excitation: 785 nm.

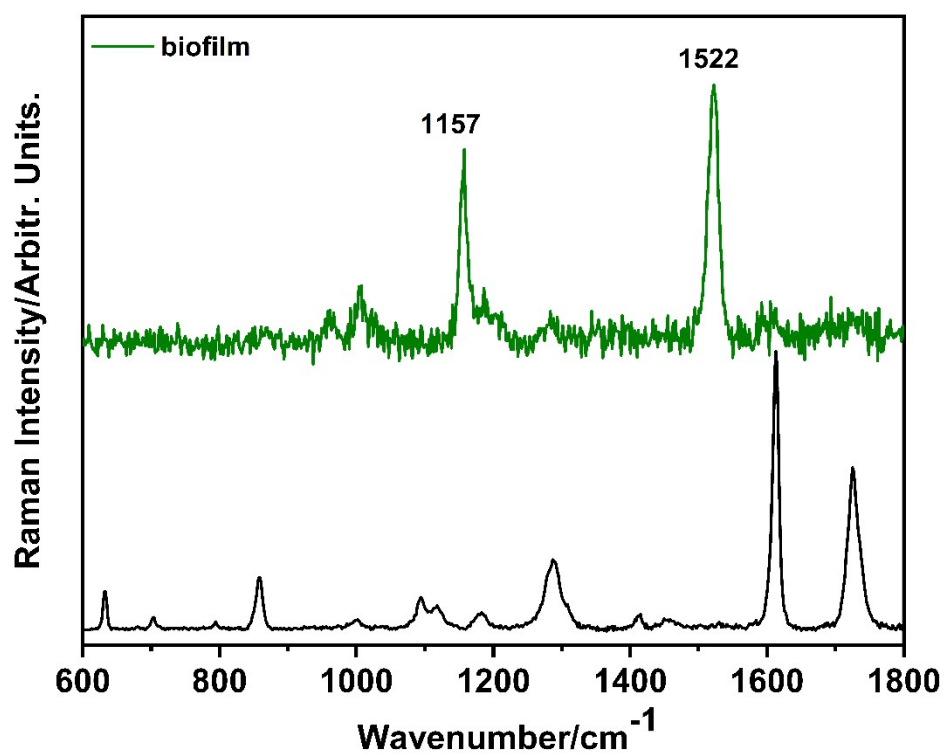

**Figure S3.** The Raman spectra of polyethylene terephthalate (PET) bottle (black line) and biofilm (green line) formed on the inner surface of the PET (excitation: 532 nm).

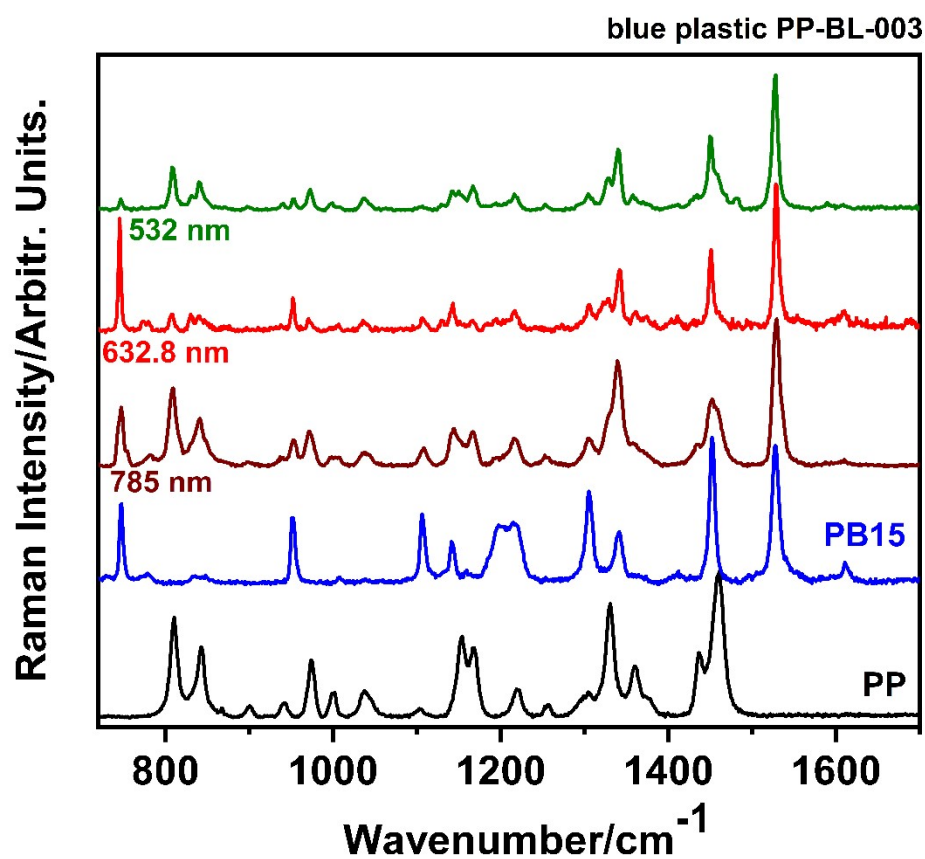

**Figure S4.** Normalized Raman spectra of PP-BL-003 sample at three excitation lines, 532 nm (green line), 632.8 nm (red line), and 785 nm (dark red line); with blue line is the specific Raman spectrum of PB15 pigment (excitation: 632.8 nm) and with black line is the reference spectrum of polypropylene (excitation: 785 nm).

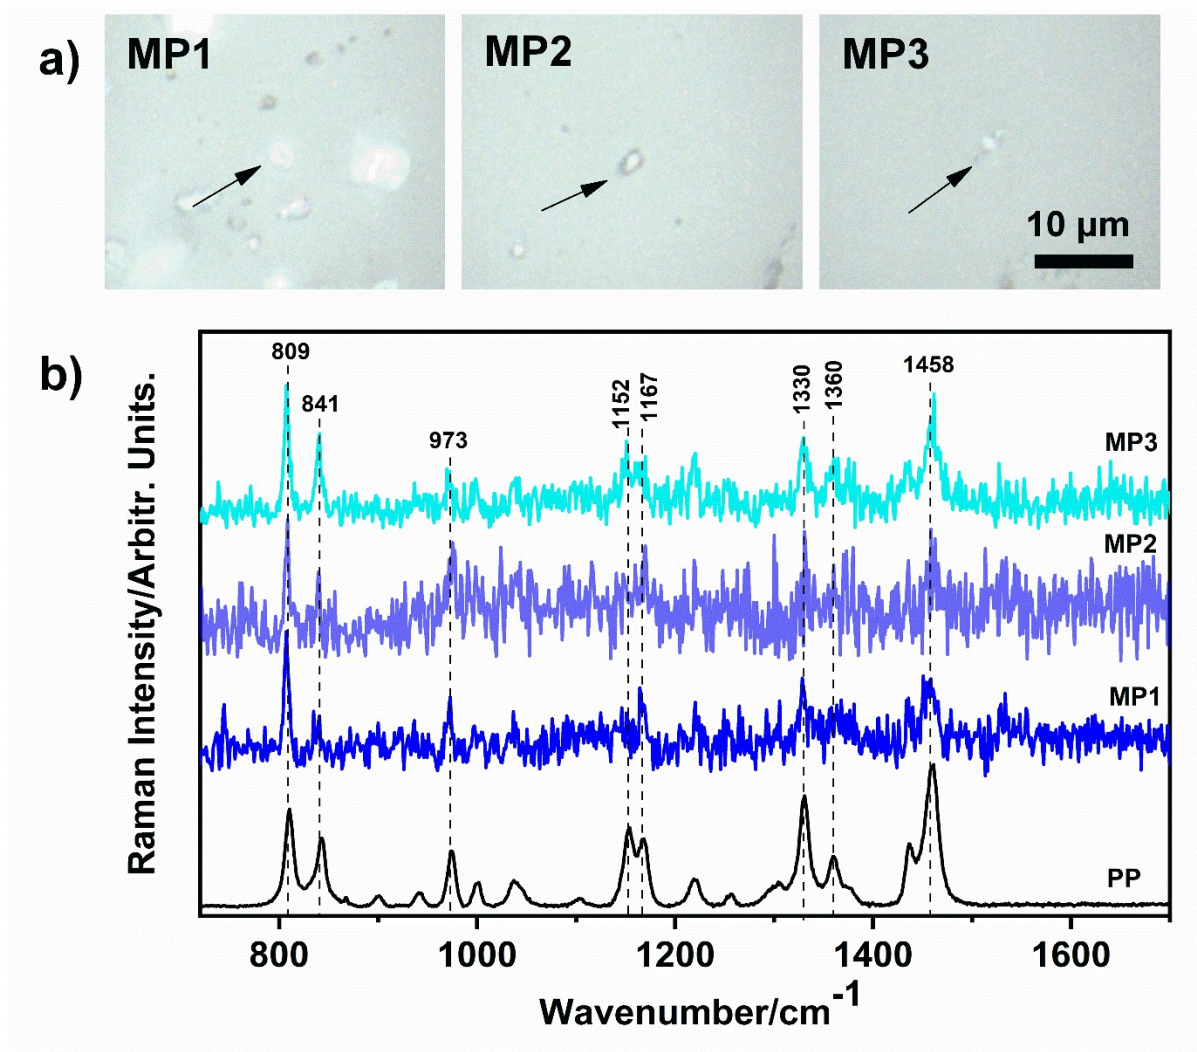

**Figure S5.** a) the optical microscopy images of three blue microplastics, MP1, MP2 and MP3 (excitation: 632.8 nm) and b) their corresponding Raman spectra; with black line is the Raman spectrum of polypropylene for reference (excitation: 785 nm).



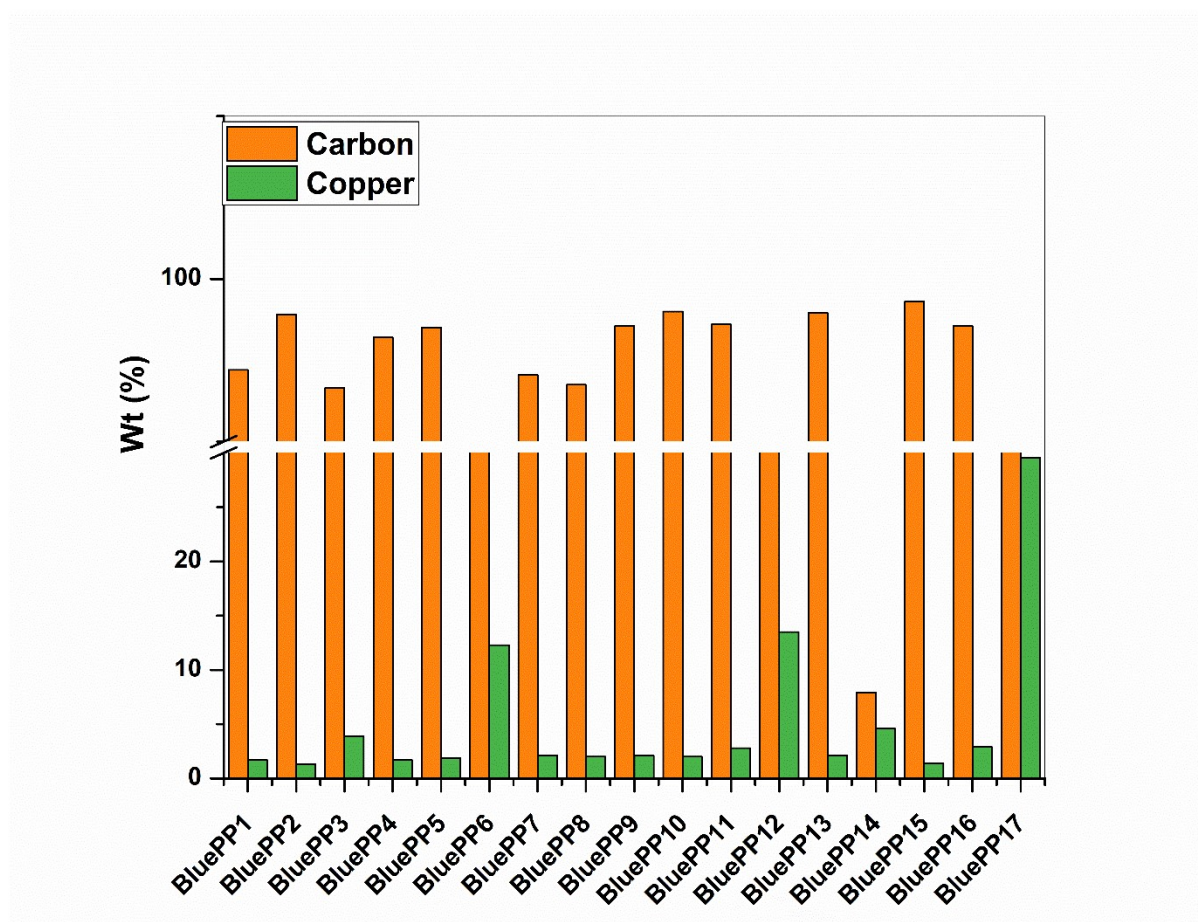

**Figure S6.** Ratio of carbon to copper content for 17 blue micro-nanoplastics analyzed by SEM-EDX.

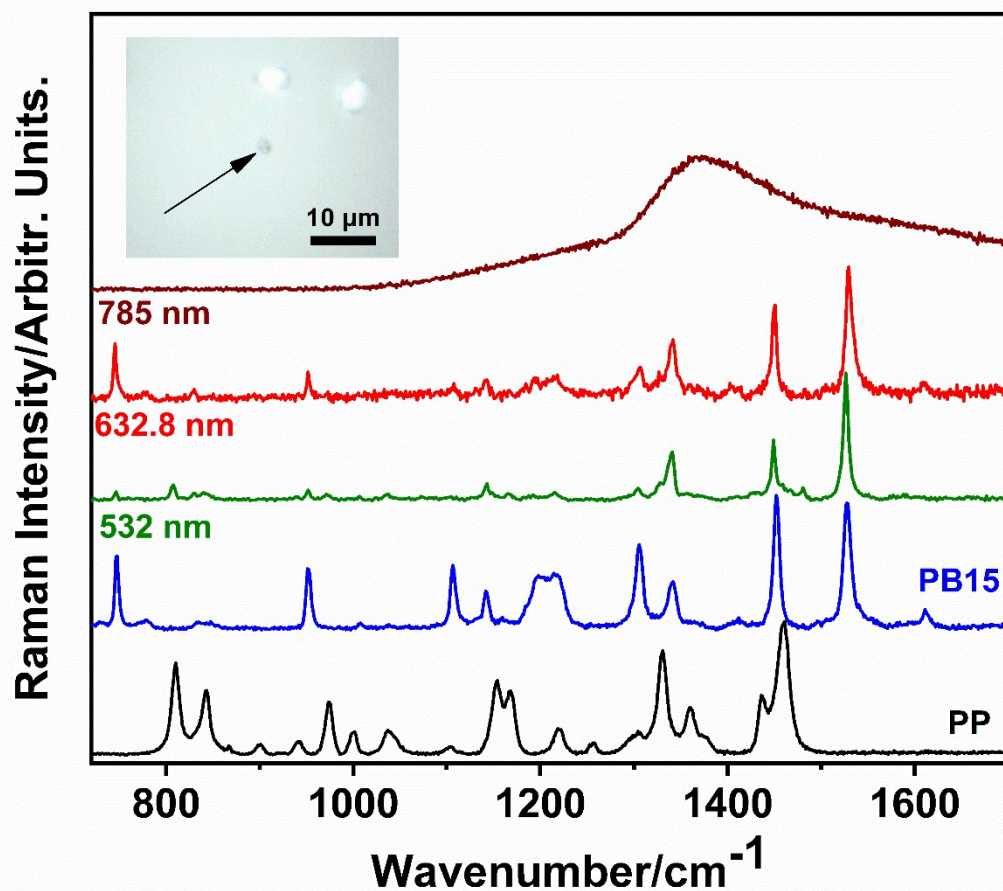

**Figure S7.** Normalized Raman spectra of a blue particle (inset image) of 1 μm at three excitation lines, 785 nm (dark red line), 632.8 nm (red line), and 532 nm (green line); with blue line is the specific Raman spectra of PB15 pigment (excitation: 632.8 nm) and with black line is the corresponding reference spectrum of polypropylene (excitation: 785 nm).
